# Supplementary material for: Unveiling the Trypanosoma cruzi Nuclear Proteome
Source: PubMed Central journal article supplement (PMC4575177; doi:10.1371/journal.pone.0138667), 2015-09-18

# S1 File. Examples of peptide mass spectra (MS/MS): Centrin and Histones

| Protein entry | Protein description                                                                 | # Peptides | Peptide sequence            | Peptide score |
|---------------|-------------------------------------------------------------------------------------|------------|-----------------------------|---------------|
| Q4DQ49        | Centrin_ putative Trypanosoma cruzi (strain CL Brener)<br>Tc00.1047053508323.60 4 1 | 8          | AFQLFDLDKK                  | 7,6496        |
|               |                                                                                     |            | GLGFGDLPR                   | 7,3367        |
|               |                                                                                     |            | GLGFGDLRDEVER               | 6,7946        |
|               |                                                                                     |            | AFQLFDLDK                   | 7,0327        |
|               |                                                                                     |            | EAFNLFADGSGAIDAEEM<br>ALAMK | 6,7973        |
|               |                                                                                     |            | TMSTDSNGLIGYGEFER           | 6,9267        |
|               |                                                                                     |            | AALTDEQIR                   | 7,6967        |
|               |                                                                                     |            | TMSTDSNGLIGYGEFER           | 6,5735        |

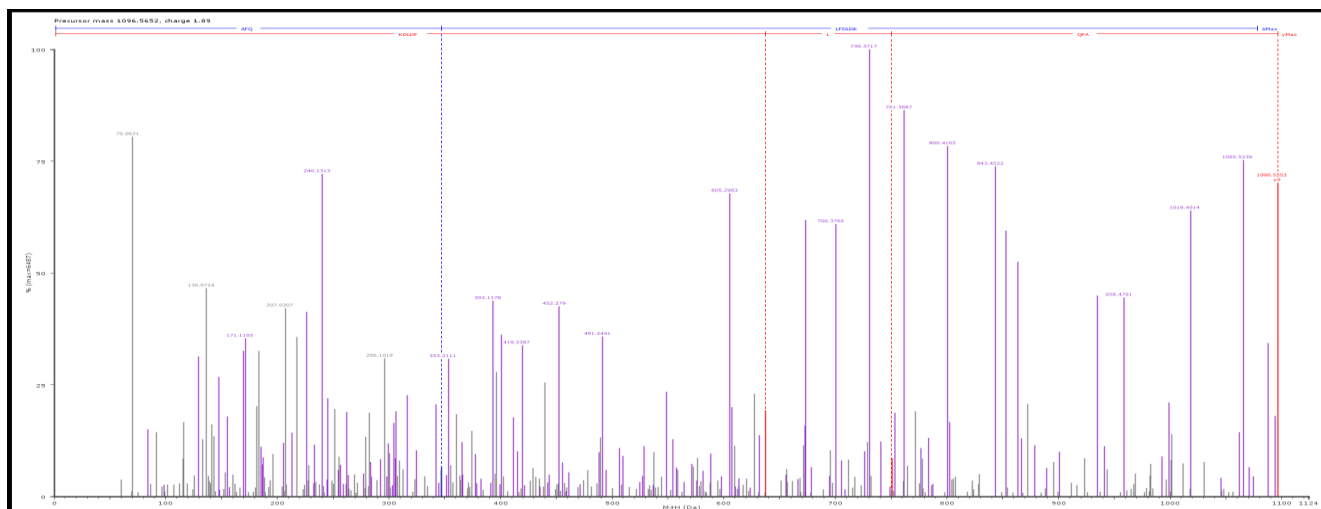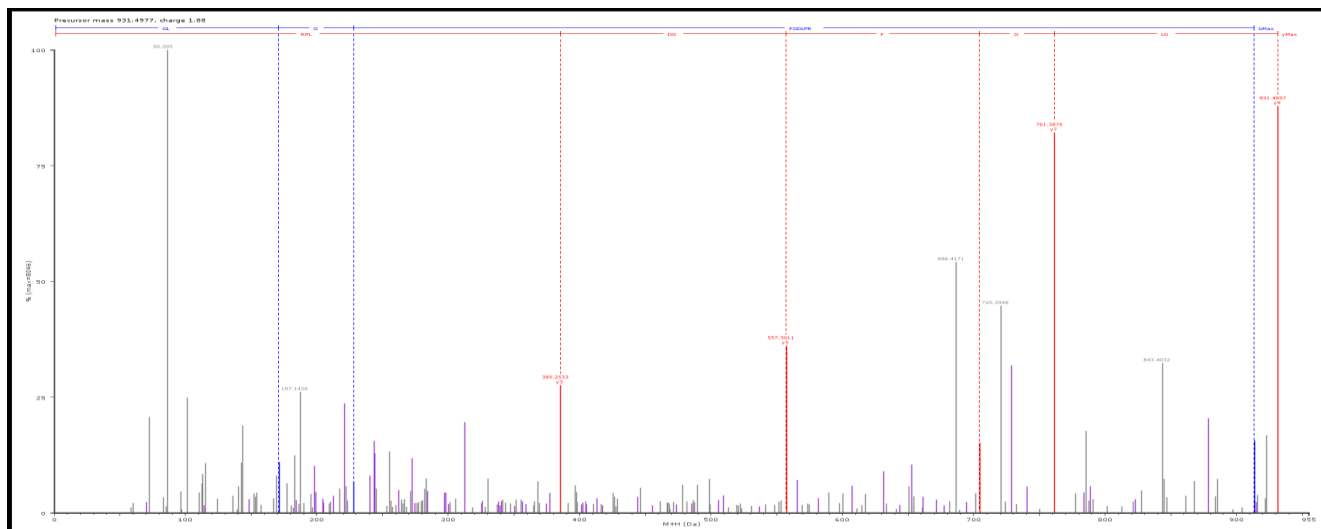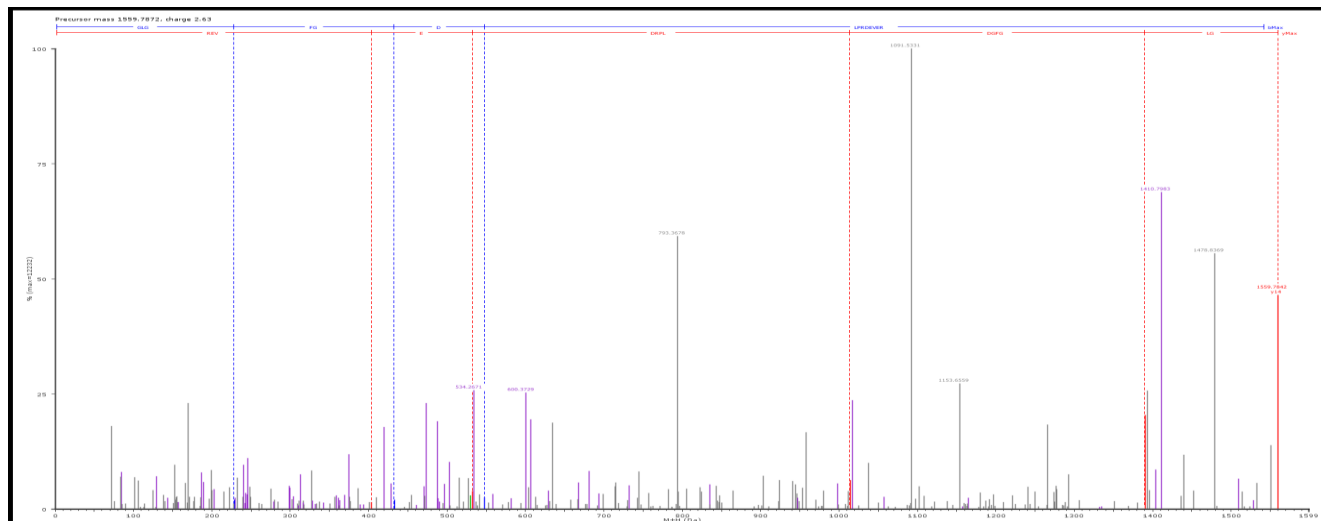

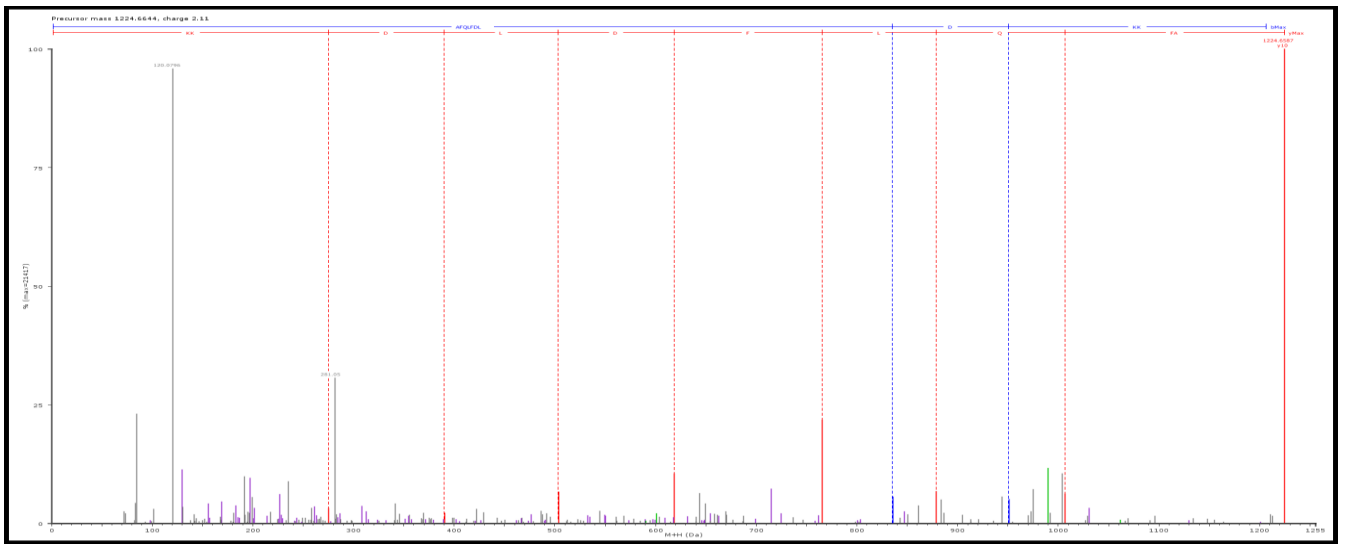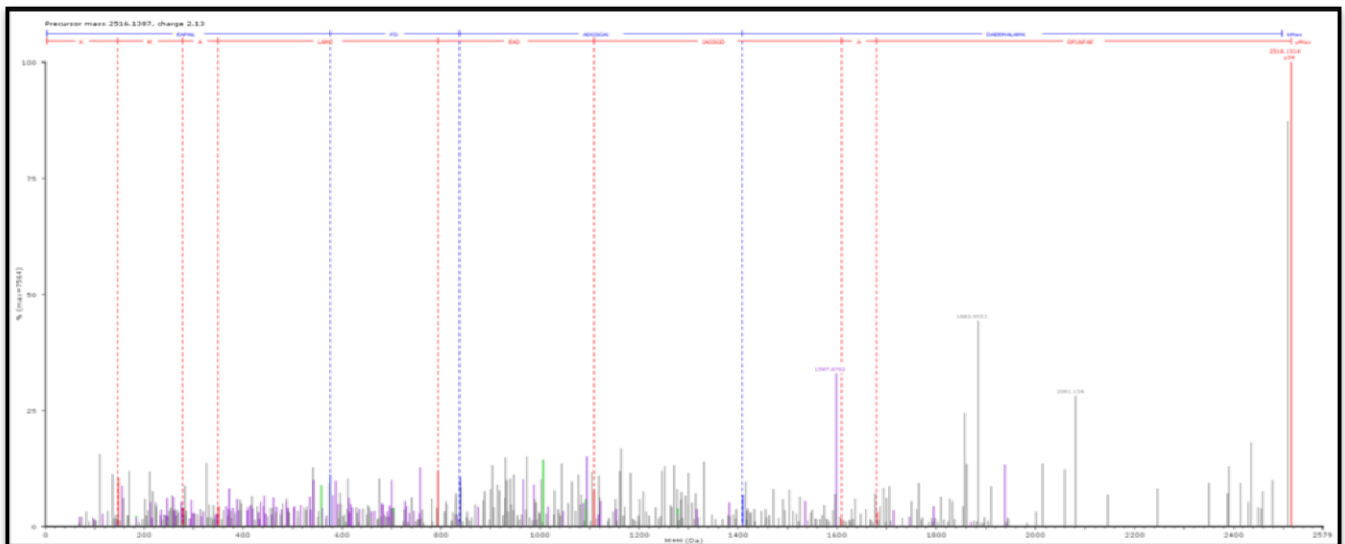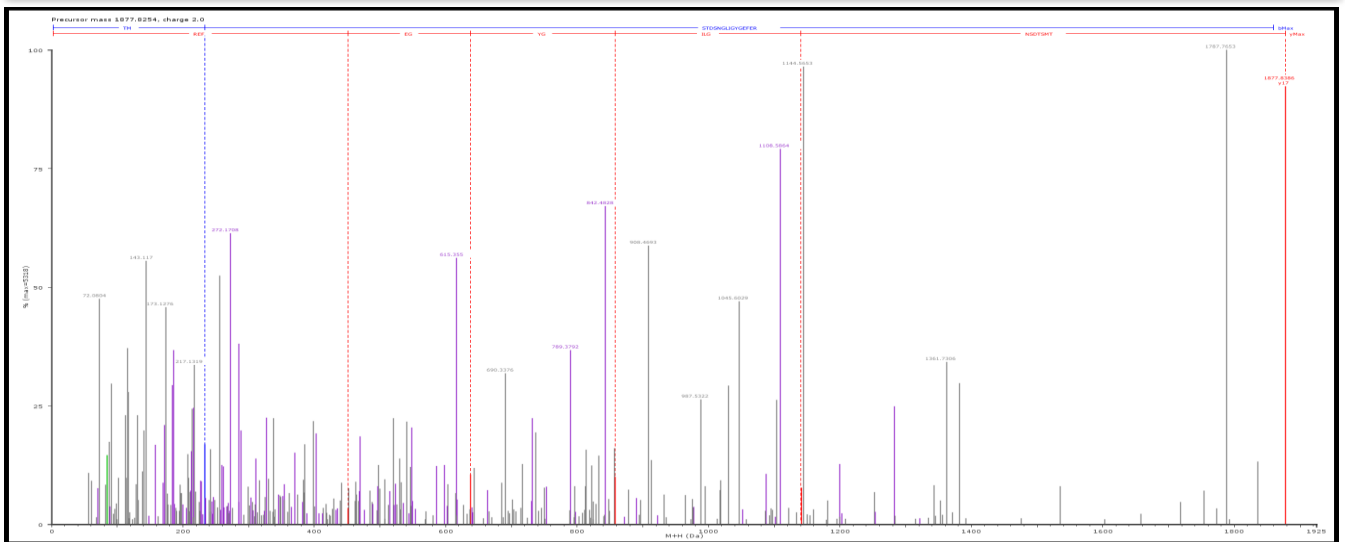

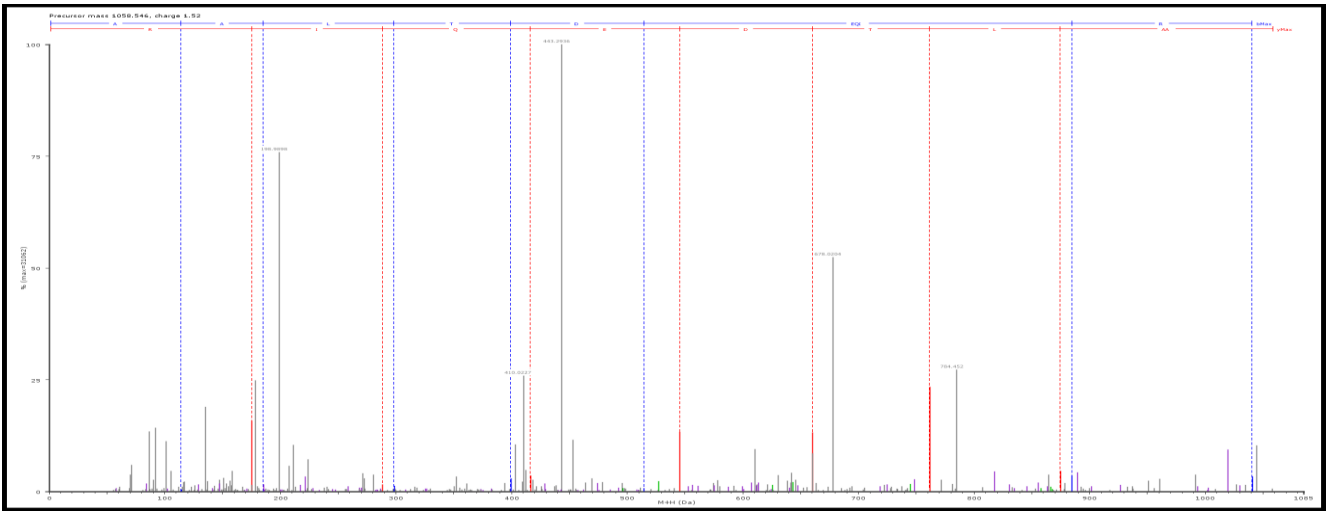

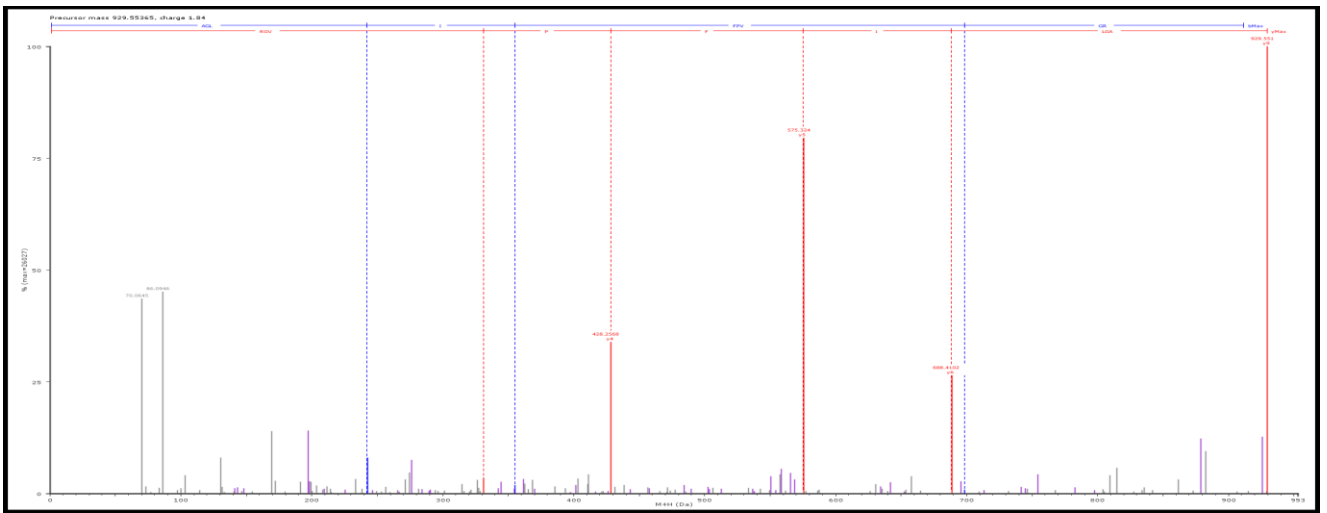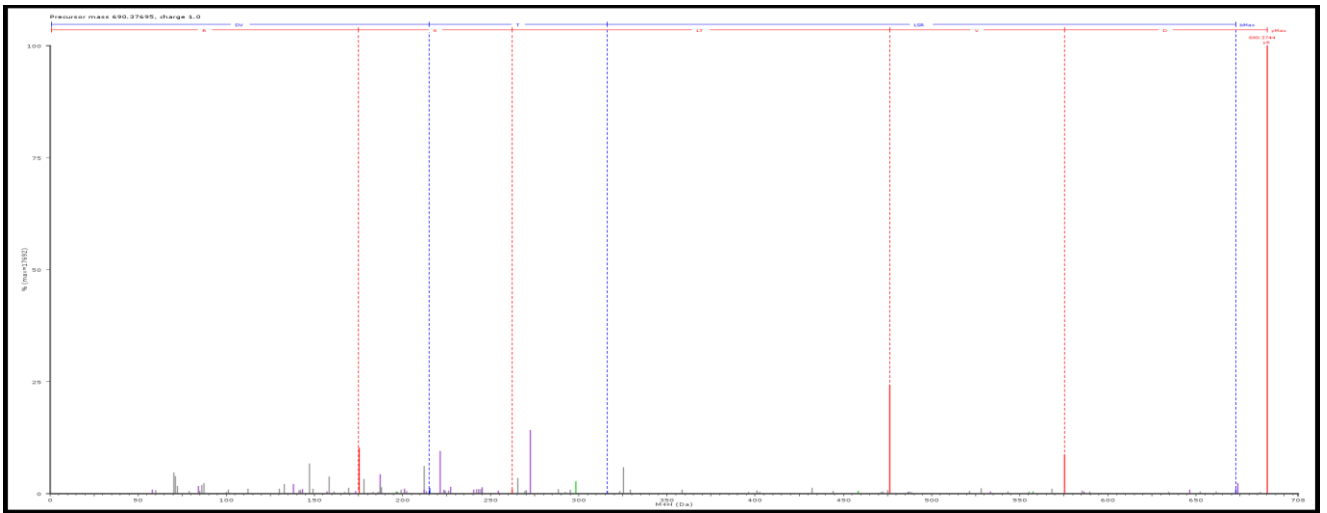

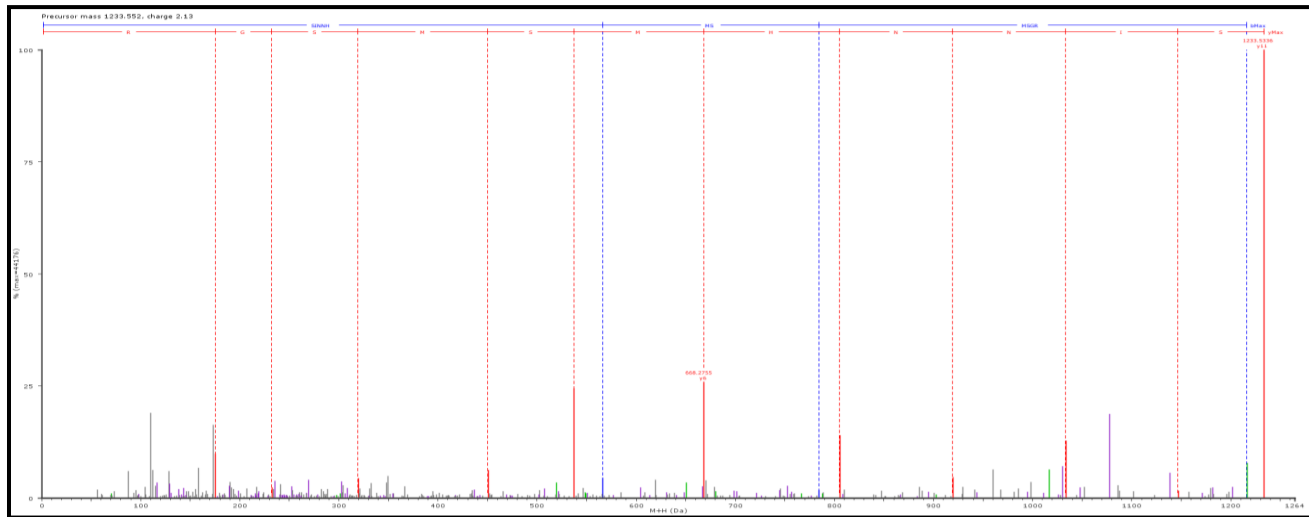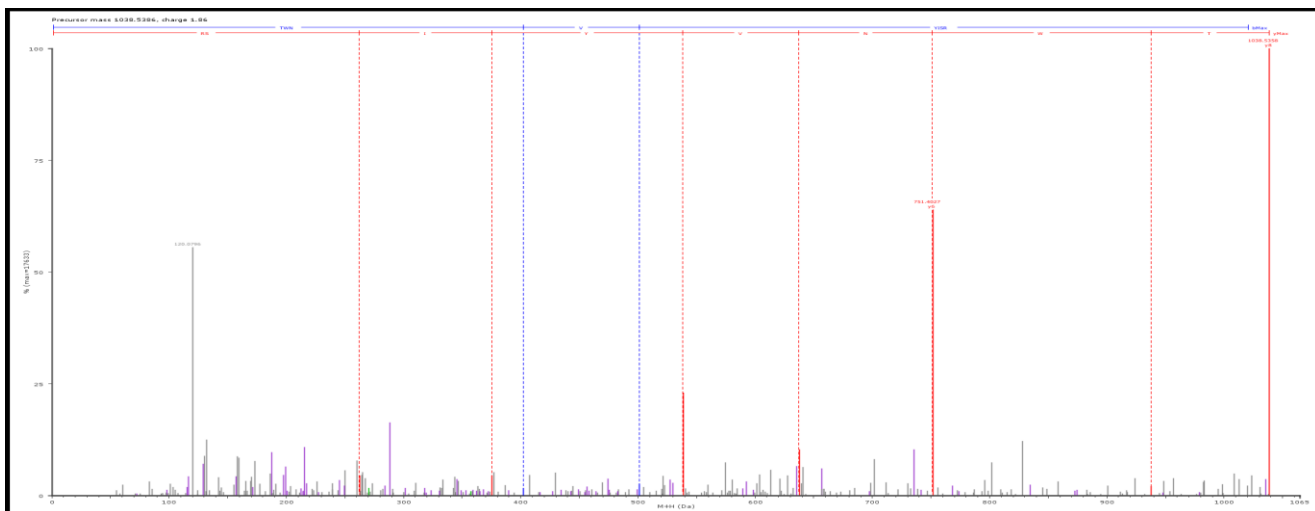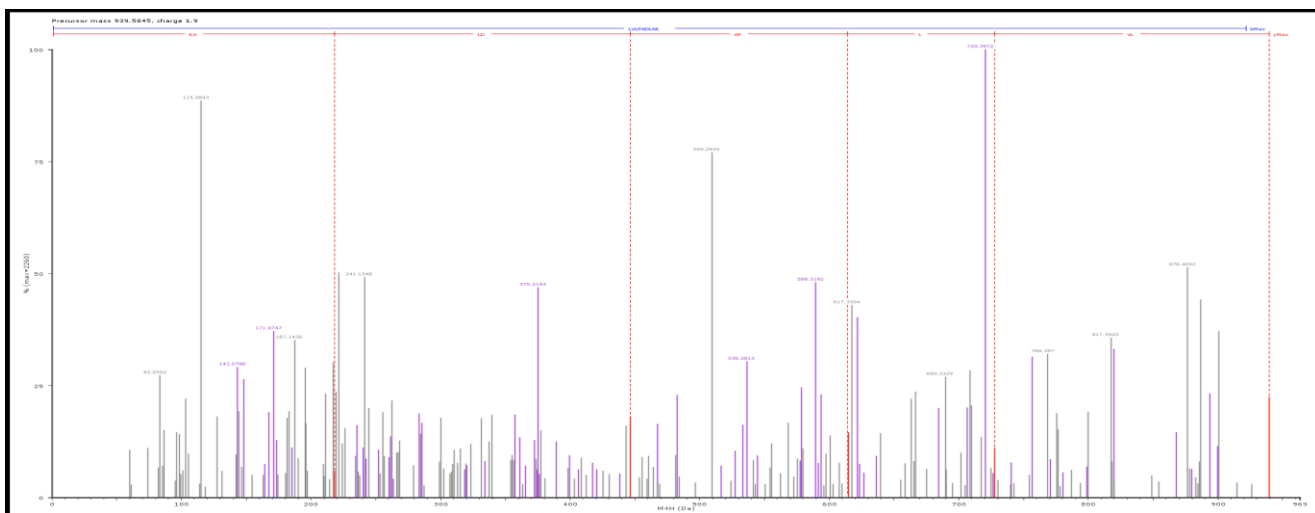



| Protein entry | Protein description                                                        | Peptide sequence | Peptide score |
|---------------|----------------------------------------------------------------------------|------------------|---------------|
| Q4DEL1        | Histone H4 Trypanosoma cruzi (strain CL Brener) Tc00.1047053507941.150 3 1 | TVTAVDVVNALR     | 9,1406        |
|               |                                                                            | TVTAVDVVNALRK    | 7,6205        |
|               |                                                                            | SFVEGVVR         | 8,4695        |
|               |                                                                            | ISGVIYDEVK       | 8,7713        |
|               |                                                                            | KTVTAVDVVNALR    | 7,1371        |

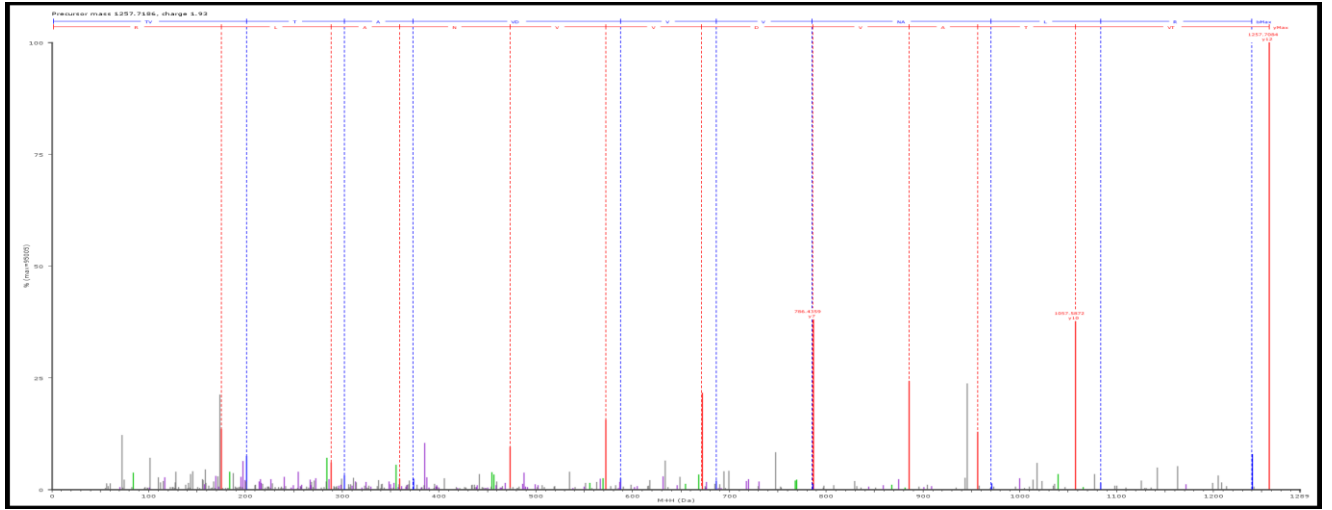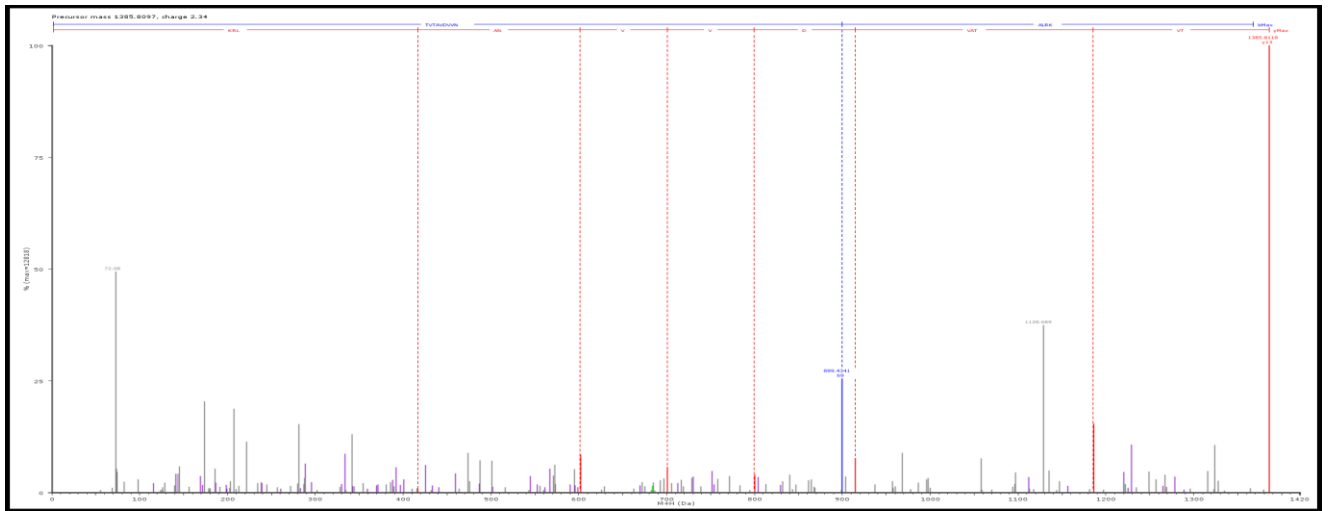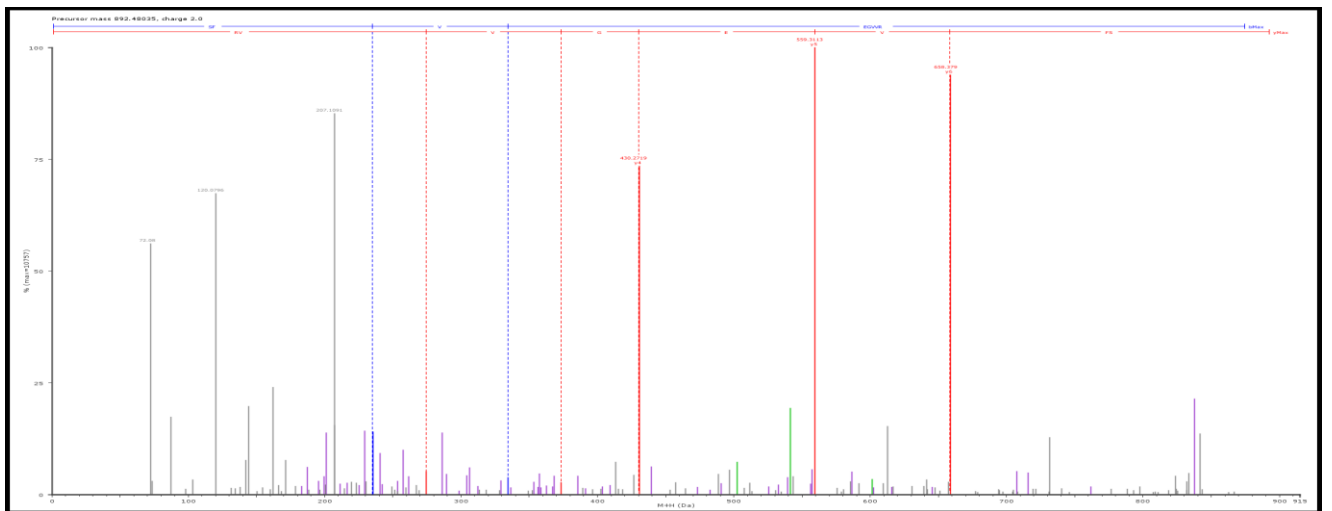

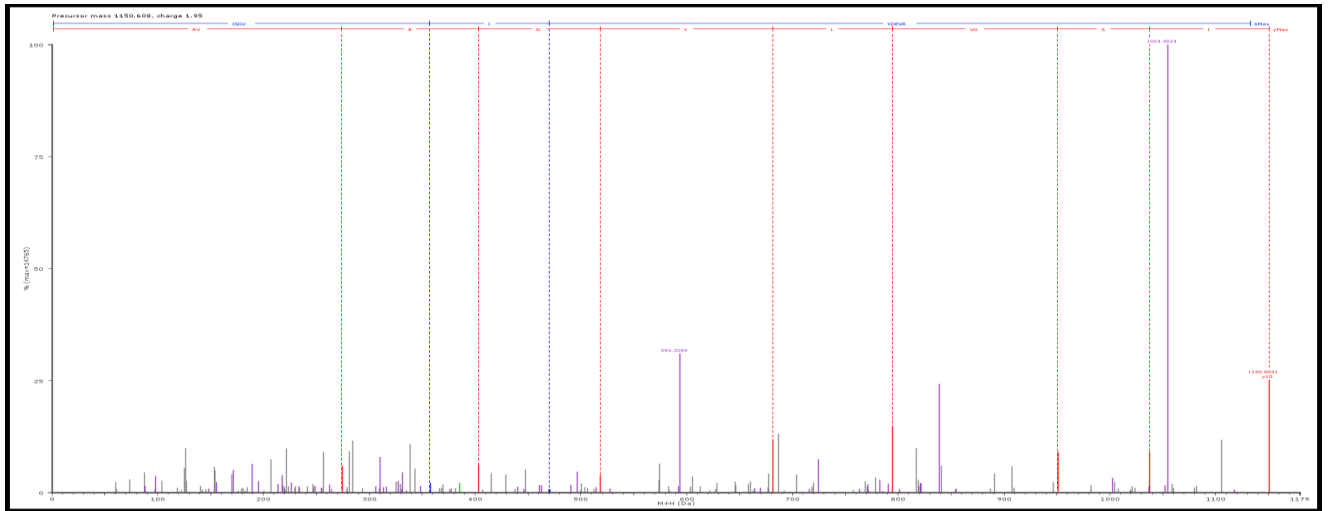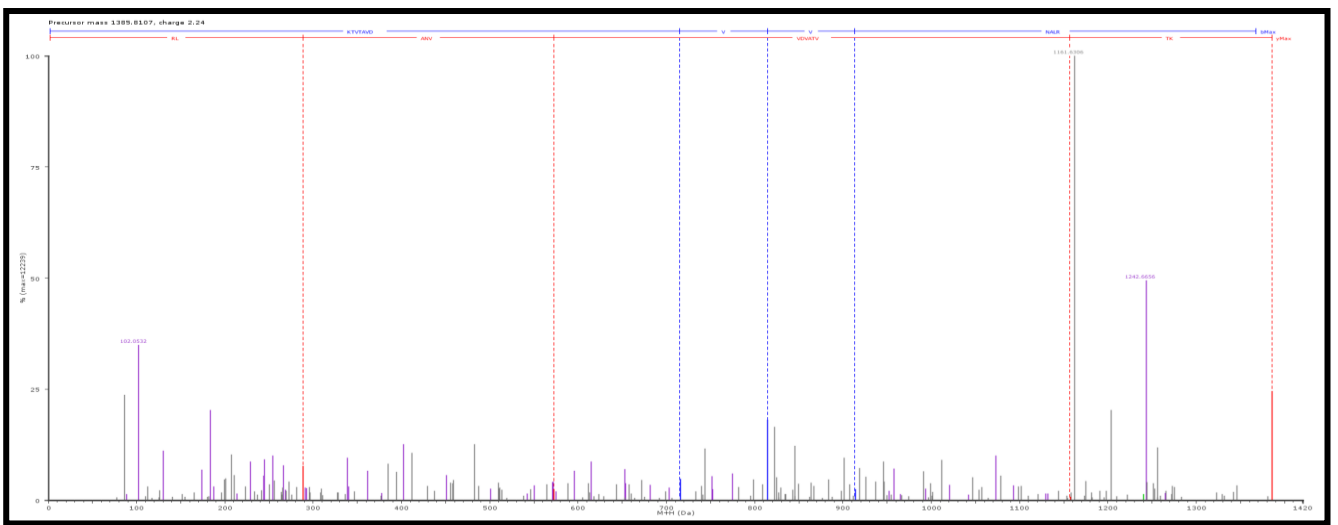

Supplement: pone.0138667.s001.pdf [file pone.0138667.s001.pdf]
